# Supplementary material for: Elevated CO2 and/or ozone modify lignification in the wood of poplars (Populus tremula x alba)
Source: PubMed Central journal article supplement — J Exp Bot. 2012 May 2;63(11):4291–301. doi: 10.1093/jxb/ers118 (PMC3398455; doi:10.1093/jxb/ers118), 2012-05-02
Supplement: supp_ers118_00074161-file001.pdf [file supp_ers118_00074161-file001.pdf]

Elevated CO<sub>2</sub> and/or ozone modify lignification in the wood of poplars (*Populus tremula x alba*)  
 Nicolas Richet, Dany Afif, Koffi Tozo, Brigitte Pollet, Pascale Maillard, Françoise Huber, Pierrick Priault, Jacques Banvoy, Patrick Gross, Pierre Dizengremel, Catherine Lapierre, Patrick Perré, Mireille Cabané

**Supplementary Table S1.** Primers used in quantitative real-time PCR

| <i>Gene</i>     | <i>Forward primer</i>       | <i>Reverse primer</i>      |
|-----------------|-----------------------------|----------------------------|
| <i>PAL 1/3</i>  | CCATCCAGGTCAAATTGAGGCTGCT   | ACTTCTTAGCTGCCTTCATGTAAGCT |
| <i>PAL 2</i>    | CCTAGAAGCCATCACCAAGTTGCTC   | GTTTCTCCATTGGGTCCCACG      |
| <i>PAL 4</i>    | AAAGGTGCCGAAATTGCCATGG      | TGCAGAAATCAAGCCCAAGGAG     |
| <i>PAL 5</i>    | GAGATGCTGGAAGCTATCACCAAGC   | GGCTCTCCATTGGGTCCAAC       |
| <i>C4H1</i>     | AATGGGGGTGTCACGTGTAATCT     | GGAAAGGTGCTCAATCAAAATCT    |
| <i>C4H2</i>     | GAAATGTGCAATTGATCATATTTTG   | ATTGCAGCAACATTGATGTTCTCC   |
| <i>4CL3</i>     | CCAGGCATATAACTGAAGACGTTA    | GTTCTTACGTTTGGTACGTGTCTT   |
| <i>4CL5</i>     | GTGATCATGCTCATCCTGCCAAGT    | TTGGCAGCAGTAGTAATGGCACCT   |
| <i>CCR2</i>     | GCTAGGGAAAGGAGCATATTAAGA    | CCACAAATACAAGTTGAACATTTGA  |
| <i>CAD1</i>     | TGACCGTCTGTCTTTGCTTTTAAA    | GGACAGATCACCCAGATGCA       |
| <i>HCT1</i>     | TGCAAGCTGAACACATGAACTAT     | GGACAGAAACCATGACAGGATAAT   |
| <i>C3H3</i>     | ACAAACGTGTTGCTGTTGATATT     | TTGACAGAGATTCGTTGACATTT    |
| <i>CCoAOMT1</i> | ACCTGCCAGTATTGTTATCTGATGT   | CCATTGAAATACAAAGTGGGTAAAA  |
| <i>CCoAOMT2</i> | TTACCGACCTTGCTTATATTTTGTA   | ACAGCGTGATAAGTACTTGGTTAAA  |
| <i>CAld5H1</i>  | TTTGCATGTTTTTTTCTAGTTTTT    | TCTCTCCATTTTTTATCTCTTCATT  |
| <i>CAld5H2</i>  | AAGCCAATATAGGCAAGCCTGTGAATC | ATTTTTAGCCCCGAAAGCTGCTCTG  |
| <i>COMT2</i>    | TGCTGCTGTCTCTGCTTTTGAT      | GGAAGGCGGTGAAGTTATTTGA     |

**Supplementary Table S2.** Statistical analyses of transcript levels of different genes involved in lignin biosynthesis in lower stems. Analyses were performed on opposite wood (OW) and tension wood (TW) by comparing the control to the other treatments. The difference between control and treatments was statistically significant at  $P < 0.05$  (red) or  $P < 0.1$  (brown). Control (C), ozone 200 nl l<sup>-1</sup> (O<sub>3</sub>), elevated CO<sub>2</sub> 800 μl l<sup>-1</sup> (CO<sub>2</sub>) and the combination of ozone and elevated CO<sub>2</sub> (O<sub>3</sub> + CO<sub>2</sub>).

| Gene            | Tissue | C vs CO <sub>2</sub> | C vs O <sub>3</sub> + CO <sub>2</sub> | C vs O <sub>3</sub> |
|-----------------|--------|----------------------|---------------------------------------|---------------------|
| <i>PAL1/3</i>   | OW     | 0.073                | 0.108                                 | 0.080               |
|                 | TW     | 0.223                | 0.275                                 | 0.079               |
| <i>PAL2</i>     | OW     | 0.265                | 0.104                                 | 0.003               |
|                 | TW     | 0.401                | 0.400                                 | 0.249               |
| <i>PAL4</i>     | OW     | 0.953                | 0.473                                 | 0.011               |
|                 | TW     | 0.064                | 0.006                                 | 0.000               |
| <i>PAL5</i>     | OW     | 0.190                | 0.354                                 | 0.003               |
|                 | TW     | 0.041                | 0.012                                 | 0.001               |
| <i>C4H1</i>     | OW     | 0.960                | 0.480                                 | 0.001               |
|                 | TW     | 0.121                | 0.096                                 | 0.001               |
| <i>C4H2</i>     | OW     | 0.473                | 0.070                                 | 0.009               |
|                 | TW     | 0.018                | 0.003                                 | 0.001               |
| <i>4CL3</i>     | OW     | 0.904                | 0.151                                 | 0.002               |
|                 | TW     | 0.073                | 0.026                                 | 0.001               |
| <i>4CL5</i>     | OW     | 0.903                | 0.831                                 | 0.004               |
|                 | TW     | 0.209                | 0.159                                 | 0.008               |
| <i>CCR2</i>     | OW     | 0.204                | 0.010                                 | <0.0001             |
|                 | TW     | 0.559                | 0.000                                 | <0.0001             |
| <i>CAD1</i>     | OW     | 0.364                | 0.223                                 | 0.057               |
|                 | TW     | 0.822                | 0.005                                 | 0.001               |
| <i>HCT1</i>     | OW     | 0.203                | 0.133                                 | 0.008               |
|                 | TW     | 0.225                | 0.101                                 | 0.003               |
| <i>C3H3</i>     | OW     | 0.981                | 0.294                                 | 0.008               |
|                 | TW     | 0.204                | 0.251                                 | 0.008               |
| <i>CCoAOMT1</i> | OW     | 0.738                | 0.230                                 | 0.023               |
|                 | TW     | 0.221                | 0.210                                 | 0.021               |
| <i>CCoAOMT2</i> | OW     | 0.334                | 0.300                                 | 0.001               |
|                 | TW     | 0.377                | 0.029                                 | 0.001               |
| <i>CAld5H1</i>  | OW     | 0.922                | 0.142                                 | 0.031               |
|                 | TW     | 0.855                | 0.139                                 | 0.022               |
| <i>CAld5H2</i>  | OW     | 0.691                | 0.608                                 | 0.011               |
|                 | TW     | 0.036                | 0.110                                 | 0.002               |
| <i>COMT2</i>    | OW     | 0.651                | 0.624                                 | 0.006               |
|                 | TW     | 0.265                | 0.488                                 | 0.004               |

**Supplementary Table S3** : Lignin and extractive content relative to dry mass (DM) in opposite (OW) and tension wood (TW) of lower and middle stems of hybrid poplar, after 60 days of growth under different conditions, control (filtered air), elevated CO<sub>2</sub> (800 µl l<sup>-1</sup>), ozone (200 nl l<sup>-1</sup>) or the combination of elevated CO<sub>2</sub> and ozone. Values are mean ± SE, *n* = 3. Difference between the control and treatments was statistically significant at *P* < 0.05 (\*\*), *P* < 0.1 (\*).

|                                 | Control      | Elevated CO <sub>2</sub> | elevated CO <sub>2</sub><br>and ozone | Ozone          |
|---------------------------------|--------------|--------------------------|---------------------------------------|----------------|
| <b>Klason Lignin<br/>(% DM)</b> |              |                          |                                       |                |
| Lower Stem                      |              |                          |                                       |                |
| OW                              | 16.67 ± 0.39 | 17.04 ± 0.17             | 18.69 ± 0.23 **                       | 17.76 ± 0.50 * |
| TW                              | 13.75 ± 0.27 | 13.75 ± 0.35             | 14.99 ± 0.36 **                       | 14.16 ± 0.33   |
| Middle Stem                     |              |                          |                                       |                |
| OW                              | 16.52 ± 0.22 | 16.42 ± 0.25             | 17.69 ± 0.37 **                       | 17.05 ± 0.10   |
| TW                              | 14.62 ± 0.31 | 13.79 ± 0.51             | 14.92 ± 0.53                          | 15.34 ± 0.66   |
| <b>Extractives<br/>(% DM)</b>   |              |                          |                                       |                |
| Lower Stem                      |              |                          |                                       |                |
| OW                              | 22.64 ± 2.83 | 29.21 ± 0.93 **          | 24.27 ± 1.52                          | 22.88 ± 1.88   |
| TW                              | 21.39 ± 1.09 | 26.80 ± 0.42 **          | 24.00 ± 1.18 *                        | 22.08 ± 0.25   |
| Middle Stem                     |              |                          |                                       |                |
| OW                              | 26.96 ± 1.16 | 30.75 ± 0.35 **          | 26.59 ± 1.67                          | 26.58 ± 0.47   |
| TW                              | 23.30 ± 0.67 | 31.13 ± 2.31 **          | 28.52 ± 1.62 *                        | 26.84 ± 1.81   |

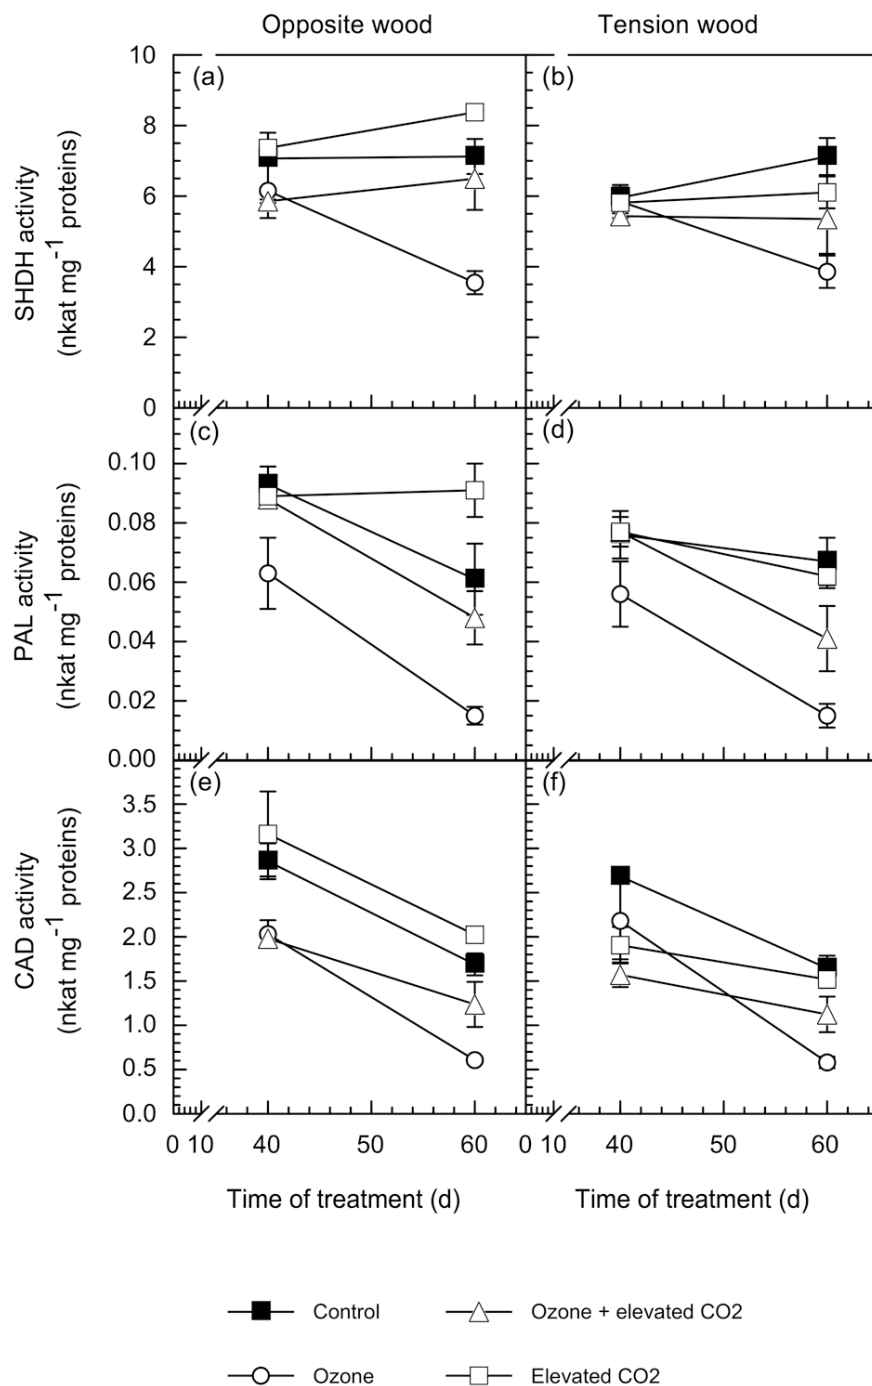

**Supplementary Fig. S1.** Time course of the activities of SHDH (a, b), PAL (c, d) and CAD (e, f) enzymes in opposite wood (a, c, e) and tension wood (b, d, f) of middle stem from hybrid poplar subjected to different treatments. Values are mean  $\pm$  SE,  $n = 3$ .
